# Supplementary material for: A drastic influence of the anion nature and concentration on high pressure intrusion–extrusion of electrolyte solutions in Silicalite-1
Source: Royal Society of Chemistry journal article supplement (doi:10.1039/c7cp06520e), 2018-01-01
Supplement: c7cp06520e1.pdf [file c7cp06520e1.pdf]

## Drastic influence of the anion nature and concentration on high pressure intrusion-extrusion of electrolyte solutions in Silicalite-1

A. Ryzhikov\* H. Nouali, T. J. Daou and J. Patarin

Université de Strasbourg (Uds), Université de Haute Alsace (UHA), Axe Matériaux à Porosité Contrôlée (MPC),  
Institut de Science des Matériaux de Mulhouse (IS2M) UMR 7361, ENSCMu, 3 bis rue Alfred Werner, F-68093  
Mulhouse, France.

### Supporting Information

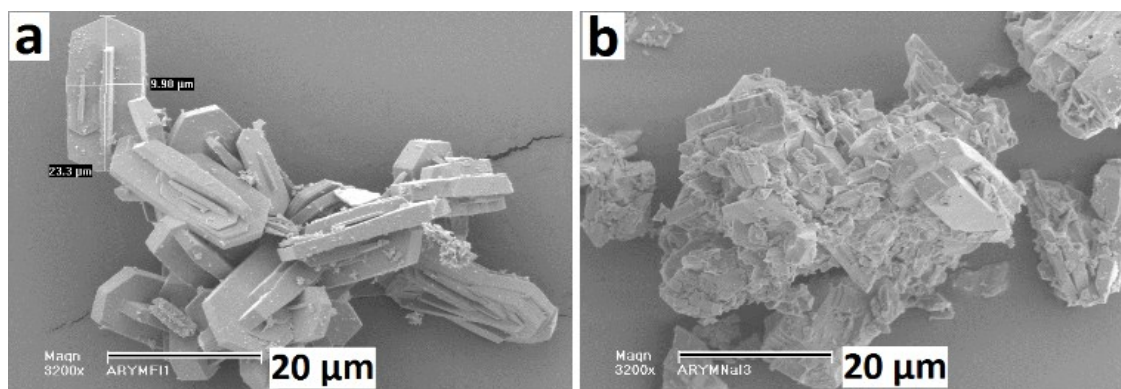

Figure S1. SEM micrographs of Silicalite-1 samples a) before intrusion, b) after three intrusion-extrusion cycles with saturated NaI solution.

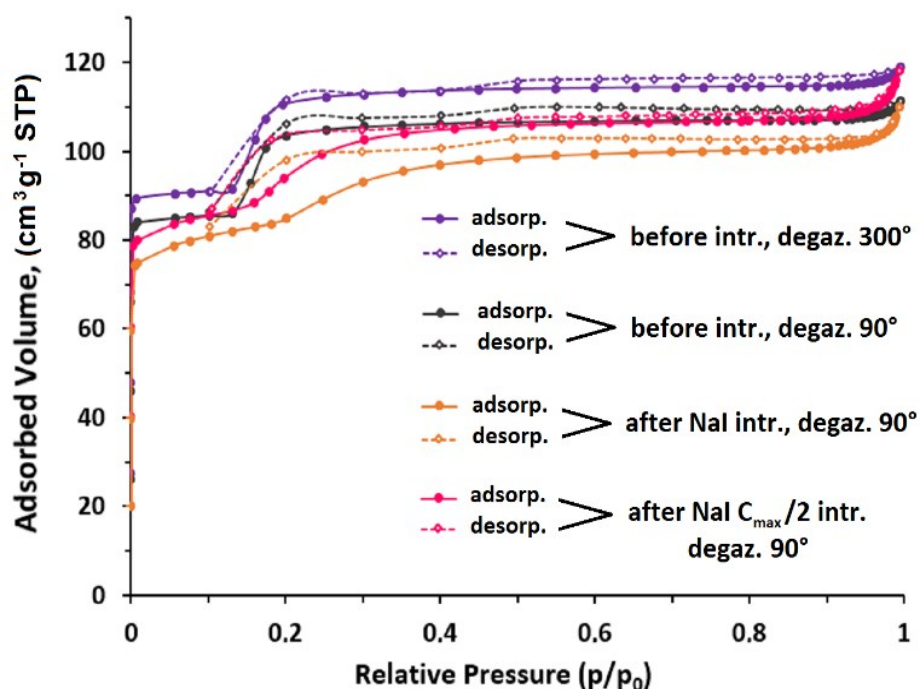

Figure S2. N<sub>2</sub> adsorption–desorption isotherms at -196 °C of the Silicalite-1 samples before (degassed at 90° and 300°C) and after three intrusion-extrusion cycles with saturated ( $C_{\max}$ ) and diluted ( $C_{\max}/2$ ) NaI solutions.

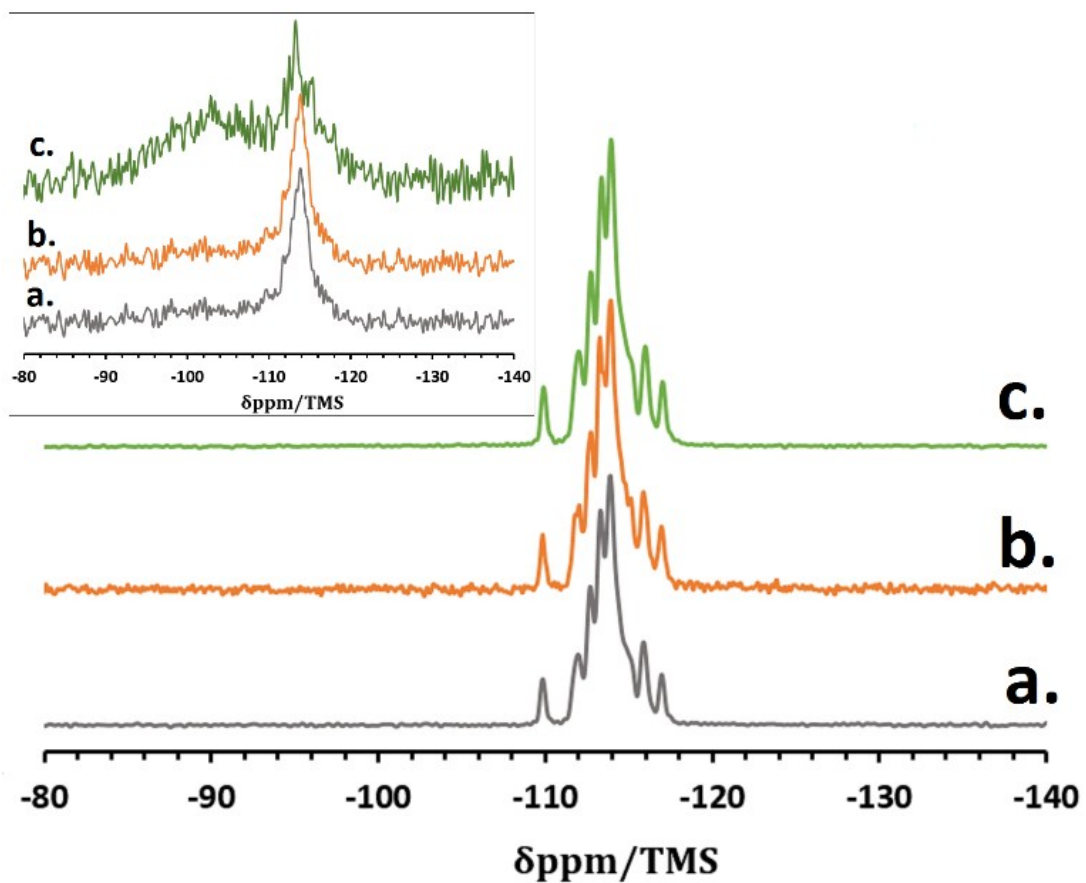

Figure S3.  $^{29}\text{Si}$ -MAS NMR and  $^1\text{H}$ - $^{29}\text{Si}$  CPMAS spectra (insert) of MFI-type zeolite samples before (a) and after three intrusion-extrusion cycles with NaI (b) and NaClO<sub>4</sub> (c) saturated solutions.
